RESEARCH ARTICLE

# Secular Trends in Prevalence of Overweight and Obesity among Adults in Rural Tianjin, China from 1991 to 2011: A Population-Based Study

Xianjia Ning<sup>1,2\*</sup>, Changqing Zhan<sup>1,2</sup>, Yihe Yang<sup>3</sup>, Li Yang<sup>2</sup>, Jun Tu<sup>1,2</sup>, Hongfei Gu<sup>4</sup>, Ta-Chen Su<sup>5</sup>, Jinghua Wang<sup>1,2\*</sup>

1. Department of Epidemiology, Tianjin Neurological Institute, Tianjin, China, 2. Department of Neurology, Tianjin Medical University General Hospital, Tianjin, China, 3. Department of Public Health, Feinberg School of Medicine, Northwestern University, Chicago, Illinois, United States of America, 4. Department of Neurology, Tianjin Dagang Oilfield General Hospital, Tianjin, China, 5. Cardiovascular Center and Department of Internal Medicine, National Taiwan University Hospital, Taipei, Taiwan

\*[xjn0906@gmail.com](mailto:xjn0906@gmail.com) (XN); [jhw8799@yahoo.com](mailto:jhw8799@yahoo.com) (JW)

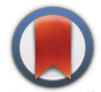

CrossMark  
click for updates

## OPEN ACCESS

**Citation:** Ning X, Zhan C, Yang Y, Yang L, Tu J, et al. (2014) Secular Trends in Prevalence of Overweight and Obesity among Adults in Rural Tianjin, China from 1991 to 2011: A Population-Based Study. PLoS ONE 9(12): e116019. doi:10.1371/journal.pone.0116019

**Editor:** Chen-Wei Pan, Medical College of Soochow University, China

**Received:** September 8, 2014

**Accepted:** November 30, 2014

**Published:** December 29, 2014

**Copyright:** © 2014 Ning et al. This is an open-access article distributed under the terms of the [Creative Commons Attribution License](https://creativecommons.org/licenses/by/4.0/), which permits unrestricted use, distribution, and reproduction in any medium, provided the original author and source are credited.

**Data Availability:** The authors confirm that all data underlying the findings are fully available without restriction. All relevant data are within the paper.

**Funding:** This study was supported in part by Tianjin Medical University General Hospital, and the People's Republic of China Ministry of Science and Technology and the Ministry of Health through the 7th, 8th, and 10th National Five-Year Key Research Plan (contracts 85-915-01-01, 85-915-01-02, and 2001BA703B01). The funders had no role in study design, data collection and analysis, decision to publish, or preparation of the manuscript.

**Competing Interests:** The authors have declared that no competing interests exist.

## Abstract

**Objectives:** Obesity is associated with cardiovascular diseases and has become the main public health issue in western countries and urban China. However, the prevalence and secular trends of obesity in rural China are currently unknown. The aim of this study was to investigate secular trends in the prevalence of overweight and obesity among rural adults in northern China between 1991 and 2011.

**Method:** The prevalence of overweight and obesity was assessed in adults aged 35–74 years living in a rural area in northern China by comparing two surveys that were conducted in 1991 and 2011, respectively.

**Result:** The age-adjusted prevalence of overweight increased from 24.5% in 1991 to 42.0% in 2011, and the prevalence of obesity increased from 5.7% in 1991 to 19.6% in 2011. Over the 21-year period, there were significant increases in the prevalence of overweight and obesity for both men and women in all age groups; however, the greatest increase was observed in men aged 35–44 years, with an 10.3-fold increase in obesity prevalence. The prevalence of obesity increased significantly in all risk factors categories, including education levels, blood pressure categories, diabetes previous history, current smoking situation and alcohol drinking situation over the past 21 years overall ( $p < 0.05$ ). The greatest increase in obesity prevalence appeared among those who consumed alcohol (increased by 8.0-fold). Next, there was a 5.3-fold increase in the prevalence of obesity in illiterate residents.

**Conclusion:** The prevalence of overweight and obesity has increased rapidly among rural adults in Tianjin over the past 21 years, with the most dramatic increase observed in young men. Therefore, the burden of obesity should serve as a call for action.

---

## Introduction

Overweight and obesity are significant clinical and public health burdens worldwide, with 205 million men and 297 million women reported to be obese in 2008 [1]. Evidence from China's first comprehensive nutrition and health survey in 2002 indicated that the prevalence rates of overweight and obesity among adults were 23% and 7%, respectively [2]. This high prevalence of obesity is associated with an increased mortality rate due to obesity-related diseases, including cardiovascular diseases, stroke, and cancer [1, 3–5].

Over the past decade, the prevalence of obesity in developed countries either remained stable or significantly decreased [6–10]; however, obesity prevalence continues to increase in developing countries, including China [11]. Along with rapid economic development, there have been great changes in lifestyle and diet in China, especially in rural areas. More than half of the Chinese population lives in rural areas, and they tend to have poor medical insurance, low educational levels, and low income. As these areas undergo urbanization, it is critical to control several important risk factors related to chronic non-infectious diseases. The long-term trends and latest prevalence rates of overweight and obesity in rural China have not yet been reported. In our previous studies, we explored the trends in the prevalence of hypertension and incidence of stroke in a rural population [12–14]. In this study, we aimed to investigate the trends and current data regarding the prevalence of overweight, obesity, and associated-cardiovascular risk factors among adults in rural China from 1991 to 2011.

## Methods

### Study population

The study population was from the Tianjin Brain Study, a population-based stroke surveillance study in a township in Tianjin, China in 1985. The sampling method was reported in the previous study [12]. There were 18 administrative villages, and 95% of residents were farmers with relatively low levels of education and income. The primary source of income was grain production; annual per capita income was <100 USD in 1991 and <1000 USD in 2010 [11]. The illiteracy rate in this population was 30% in men and 40% in women for residents aged 35–74 years in 1991 [12]. Few residents were covered by national medical insurance before 2008 [15]. Because of the household registration system and traditional

habits, the residents typically lived in the same village for generations, except married daughters or those going to the universities. Ten percent of men aged 35 to 64 years usually moved to the cities for seasonal work and returned home for harvests and festivities at least 4 times a year.

We compared the trends and prevalence of overweight and obesity between 2 surveys conducted in adults aged 35–74 years, according to the same methods of the previous study. Briefly, the first survey was conducted in 1991, and the second one was conducted in 2011 [12]. First, we divided all villages into 3 strata by geographical location: east, south, and north. We randomly sampled 2 villages from each stratum. Using a stratified cluster, random sampling method, we then selected residents aged  $\geq 15$  years without previous coronary heart disease and stroke from these 6 selected villages to participate in the survey. The population recruited in 1991 consisted of 3,007 residents aged 35–74 years; 2,349 residents (78.1%) participated in this health survey. The health survey collected data on blood pressure, body weight, and height and also included structured questionnaires on histories of heart diseases, stroke, and cancers; alcohol consumption and smoking habits; and hypertensive management. Excluding 153 subjects with incomplete data, 2,196 individuals were analyzed in this survey.

The survey conducted in 2011 originally consisted of 2,473 residents aged 35–74 years without history of coronary disease or stroke. The participants were selected from the same villages as those included in the previous survey. Of these, 1,996 residents completed both the questionnaire and physical examination (response rate of 80.7%). Excluding 57 individuals with no physical examination data, the final number of residents included in the 2011 survey was 1,939.

The ethics committee of Tianjin Medical University General Hospital approved the study, and written informed consent was obtained from all residents during recruitment.

## Survey methods

By prior appointments made in local health centers, face-to-face interviews and physical examinations were conducted by locally trained research staff guided by epidemiological professionals. The interviewers used a questionnaire designed to collect the following information: demographic data, including name, sex, date of birth, and educational level; history of hypertension, diabetes, cardiovascular disease, and stroke; family history (parents and siblings) of hypertension, diabetes, cardiovascular disease, and stroke; and behavioral habits (smoking and alcohol consumption). Smoking was defined as the use of at least 1 cigarette/daily for 1 year. Drinking was defined as consuming Chinese liquor at least once per week consecutively for 1 year. The physical examination included measurements of blood pressure, body height, and body weight.

## Measurements

Surveys were conducted from July to September in both 1991 and 2011. Body weight and height were measured to the nearest tenth of a kilogram by trained local physicians using a standard protocol and techniques, with subjects wearing light clothing and no shoes. Height was measured to the nearest tenth of a centimeter with a stadiometer, with subjects wearing no shoes. All investigators successfully completed a training program based on both questionnaire and measurement methods. Body mass index was calculated as weight (in kilograms) divided by the square of height (in meters). According to standard criteria in Chinese adults, overweight and obesity were defined as body mass indices of 24.0–27.9 kg/m<sup>2</sup> and  $\geq 28.0$  kg/m<sup>2</sup>, respectively [16].

Hypertension was defined as an average SBP  $\geq 140$  mmHg and/or an average DBP  $\geq 90$  mmHg, or self-reported hypertension with or without current use of antihypertensive medication. Blood pressure was defined as follows: normal (SBP  $< 120$  mmHg and DBP  $< 80$  mmHg); prehypertension (SBP = 120–139 mmHg and/or DBP = 80–89 mmHg); stage I hypertension (SBP = 140–159 mmHg and/or DBP = 90–99 mmHg); and stage II hypertension (SBP  $\geq 160$  mmHg and/or DBP  $\geq 100$  mmHg) [17].

Diabetes was defined according to self-reported the previous history of diabetes or current use of antidiabetic medication.

## Statistical analysis

The age-adjusted prevalence of overweight and obesity and 95% confidence intervals were calculated using direct standardization, with the 2000 world population used as the standard [18]. Continuous variables were presented as the mean  $\pm$  standard deviation, and values were compared between 1991 and 2011 using the Student's *t*-test. Categorical variables were presented as frequencies and the 95% confidence interval, and values were compared between 1991 and 2011 using the chi-square test. The prevalence of overweight and obesity was analyzed by age group (35–44, 45–54, 55–64, and 65–74 years) and sex. Educational level was divided into 4 groups according to the years of education received: illiterate,  $< 6$  years, 6–8 years, and  $\geq 9$  years. The odds ratios of hypertension to overweight and obesity were calculated by multivariate regression analyses, adjusted by education level, smoking, and alcohol consumption. We used multivariate regression to estimate age adjusted odds ratios and 95% confidence intervals for overweight and obesity. A *p* value  $< 0.05$  was considered statistically significant. SPSS for Windows (version 13.0; SPSS Inc., Chicago, IL, USA) was used for analyses.

## Results

### Characteristics of the study population for the two surveys

In 1991, there were 2,196 residents aged 35–74 years without a history of cardiovascular and cerebrovascular diseases. There were 1,939 corresponding participants included in the 2011 survey. The prevalence of illiteracy declined from 35.6% in 1991 to 14.1% in 2011. The frequency of self-reported diabetes and alcohol consumption increased, whereas the rate of smoking significantly decreased from 1991 to 2011. Hypertension prevalence increased by 30%, with 40% incidence in 1991 and 52% incidence in 2011 ( $p < 0.001$ ; [Table 1](#)).

### Trends in prevalence of overweight and obesity by age and gender between 1991 and 2011

[Table 2](#) indicates that the age-standardized prevalence of overweight significantly increased from 24.5% in 1991 to 42.0% in 2011, and the age-standardized prevalence of obesity significantly increased from 5.7% in 1991 to 19.6% in 2011 ( $p < 0.05$ ). The increase in prevalence rates of overweight and obesity in men was greater than that observed in women. The prevalence of overweight and obesity in men was 20.4% and 2.6% in 1991 and 41.2% and 17.8% in 2011; the corresponding prevalence in women was 28.7% and 8.3% in 1991 and 42.3% and 21.0% in 2011.

### Odd ratios of obesity by age and gender

[Table 3](#) outlines the odds ratios of obesity by age group and gender in 2011, using 1991 as a reference. The prevalence of overweight and obesity increased by 1.2-fold and 3.0-fold overall, respectively; the overweight and obesity rates increased by 1.7-fold and 7.1-fold in men and 82% and 1.9-fold in women. The increase in prevalence of overweight and obesity was greater in men than in women. The greatest increase was observed in men aged 35–44 years, with a 10.3-fold increase in obesity prevalence ( $p < 0.001$ ). Concurrently, a large increase in the prevalence of overweight was observed in young and middle-aged men, with an increase of more than 2-fold.

### Trends in prevalence of obesity by related risk factors between 1991 and 2011

The prevalence of obesity increased significantly in individuals with different risk factors categories, including education levels, blood pressure categories, diabetes previous history, current smoking situation and alcohol drinking situation over the past 21 years overall. The greatest increase in obesity prevalence appeared among those who consumed alcohol (increased by 8.0-fold). Next, there was a 5.3-fold increase in the prevalence of obesity in illiterate residents ([Table 4](#)).

**Table 1.** Demographic characteristics of the participants between 1991 and 2011.

| Characteristics                  | Men          |                           | Women        |                           | Total        |                           |
|----------------------------------|--------------|---------------------------|--------------|---------------------------|--------------|---------------------------|
|                                  | 1991         | 2011                      | 1991         | 2011                      | 1991         | 2011                      |
| n (%)                            | 1032 (47.0)  | 865 (44.6)                | 1164 (53.0)  | 1074 (55.4)               | 2196 (100.0) | 1939 (100.0)              |
| Age, mean (SD), year             | 50.7 (11.4)  | 54.9 (11.3) <sup>a</sup>  | 49.5 (11.3)  | 55.9 (9.6) <sup>a</sup>   | 50.1 (11.3)  | 55.5 (10.4) <sup>a</sup>  |
| Age group, n (%)                 |              |                           |              |                           |              |                           |
| 35–44 years                      | 403 (39)     | 211 (24) <sup>a</sup>     | 519 (45)     | 161 (15) <sup>a</sup>     | 922 (42)     | 372 (19) <sup>a</sup>     |
| 45–54 years                      | 236 (23)     | 173 (20)                  | 236 (20)     | 282 (33)                  | 472 (21)     | 455 (24)                  |
| 55–64 years                      | 224 (22)     | 279 (32)                  | 253 (22)     | 425 (40)                  | 477 (22)     | 701 (36)                  |
| 65–74 years                      | 169 (16)     | 205 (24)                  | 156 (13)     | 206 (19)                  | 325 (15)     | 411 (21)                  |
| Education level, n (%)           |              |                           |              |                           |              |                           |
| None                             | 312 (30.3)   | 56 (6.5) <sup>a</sup>     | 470 (40.4)   | 217 (20.2) <sup>a</sup>   | 782 (35.6)   | 273 (14.1) <sup>a</sup>   |
| 1–6 years                        | 445 (43.1)   | 292 (33.8)                | 532 (45.7)   | 406 (37.8)                | 977 (44.5)   | 698 (36.0)                |
| 7–9 years                        | 252 (24.4)   | 44 (5.0)                  | 151 (13.0)   | 402 (37.4)                | 403 (18.3)   | 843 (43.5)                |
| >9 years                         | 23 (2.2)     | 76 (8.8)                  | 11 (0.9)     | 49 (4.6)                  | 34 (1.5)     | 125 (6.5)                 |
| Hypertension, n(%)               | 402 (39.0)   | 474 (54.8) <sup>a</sup>   | 459 (39.4)   | 630 (58.7) <sup>a</sup>   | 861 (39.2)   | 1104 (56.9) <sup>a</sup>  |
| Diabetes, n(%)                   | 14 (1.4)     | 33 (3.8) <sup>c</sup>     | 39 (3.4)     | 59 (5.5) <sup>a</sup>     | 53 (2.4)     | 92 (4.7) <sup>a</sup>     |
| Smoking, n(%)                    | 475 (46.0)   | 318 (36.8) <sup>a</sup>   | 43 (3.7)     | 51 (4.7)                  | 518 (23.5)   | 369 (19.0) <sup>a</sup>   |
| Alcohol consumption, n(%)        | 195 (18.9)   | 273 (31.6) <sup>a</sup>   | 4 (0.3)      | 48 (4.5) <sup>a</sup>     | 199 (9.1)    | 321 (16.6) <sup>a</sup>   |
| SBP, mean(SD), mm Hg             | 130.5 (18.7) | 140.7 (22.3) <sup>a</sup> | 132.0 (23.7) | 142.6 (22.2) <sup>a</sup> | 131.3 (21.5) | 141.7 (22.3) <sup>a</sup> |
| DBP, mean(SD), mm Hg             | 81.9 (11.2)  | 86.2 (13.6) <sup>a</sup>  | 81.5 (12.5)  | 85.8 (12.1) <sup>a</sup>  | 81.7 (11.9)  | 86.0 (12.8) <sup>a</sup>  |
| BMI, mean(SD), Kg/m <sup>2</sup> | 22.5 (2.4)   | 25.0 (3.4) <sup>a</sup>   | 23.3 (3.3)   | 25.4 (3.7) <sup>a</sup>   | 22.9 (3.0)   | 25.2 (3.6) <sup>a</sup>   |

Abbreviation: SD, standard difference; SBP, systolic blood pressure; DBP, diastolic blood pressure; BMI, body mass index.

<sup>a</sup>T-test or Chi-square test between two surveys, P<0.05.

doi:10.1371/journal.pone.0116019.t001

**Table 2.** The age-specific and sex-specific prevalence of overweight and obesity between 1991 and 2011<sup>a</sup>.

| Age group          | Men               |                                | Women             |                                | Total             |                                |
|--------------------|-------------------|--------------------------------|-------------------|--------------------------------|-------------------|--------------------------------|
|                    | 1991              | 2011                           | 1991              | 2011                           | 1991              | 2011                           |
| Overweight         |                   |                                |                   |                                |                   |                                |
| 35–44 years        | 19.4 (15.5, 23.2) | 42.2 (35.5, 48.8) <sup>c</sup> | 32.6 (28.5, 36.6) | 36.6 (29.2, 44.1) <sup>c</sup> | 26.8 (23.9, 29.7) | 39.8 (34.8, 44.8) <sup>c</sup> |
| 45–54 years        | 18.6 (13.7, 23.6) | 43.4 (36.0, 50.7) <sup>c</sup> | 30.5 (24.6, 36.4) | 47.5 (41.7, 53.3) <sup>c</sup> | 24.6 (20.7, 28.5) | 45.9 (41.3, 50.5) <sup>c</sup> |
| 55–64 years        | 25.0 (19.3, 30.7) | 38.8 (33.0, 44.5) <sup>c</sup> | 24.5 (19.2, 29.8) | 44.0 (39.3, 48.7) <sup>c</sup> | 24.7 (20.9, 28.6) | 41.9 (38.3, 45.6) <sup>c</sup> |
| 65–74 years        | 19.5 (13.6, 25.5) | 38.5 (31.9, 45.2) <sup>c</sup> | 21.2 (14.7, 27.6) | 41.7 (35.0, 48.5) <sup>c</sup> | 20.3 (15.9, 24.7) | 40.1 (35.0, 45.3) <sup>c</sup> |
| Total <sup>b</sup> | 20.4 (17.9, 22.8) | 41.2 (37.9, 44.5) <sup>c</sup> | 28.7 (23.9, 33.5) | 42.3 (39.3, 45.2) <sup>c</sup> | 24.5 (22.7, 26.3) | 42.0 (39.8, 44.2) <sup>c</sup> |
| Obesity            |                   |                                |                   |                                |                   |                                |
| 35–44 years        | 1.7 (0.5, 3.0)    | 16.6 (11.6, 21.6) <sup>c</sup> | 7.1 (4.9, 9.3)    | 18.6 (12.6, 24.6) <sup>c</sup> | 4.8 (3.4, 6.1)    | 17.5 (13.6, 21.3) <sup>c</sup> |
| 45–54 years        | 3.4 (1.1, 5.7)    | 19.7 (13.7, 25.6) <sup>c</sup> | 8.9 (5.3, 12.5)   | 23.1 (18.1, 28.0) <sup>c</sup> | 6.1 (4.0, 8.3)    | 21.8 (18.0, 25.5) <sup>c</sup> |
| 55–64 years        | 2.7 (0.6, 4.8)    | 16.7 (12.3, 21.1) <sup>c</sup> | 11.1 (7.2, 14.9)  | 21.2 (17.3, 25.1) <sup>c</sup> | 7.1 (4.8, 9.4)    | 19.4 (16.5, 22.3) <sup>c</sup> |
| 65–74 years        | 3.0 (0.4, 5.5)    | 18.5 (13.2, 23.9) <sup>c</sup> | 6.4 (2.6, 10.3)   | 21.8 (16.2, 27.5) <sup>c</sup> | 4.6 (2.4, 6.9)    | 20.2 (16.3, 24.1) <sup>c</sup> |
| Total <sup>b</sup> | 2.6 (1.6, 3.6)    | 17.8 (15.3, 20.4) <sup>c</sup> | 8.3 (6.8, 9.9)    | 21.0 (18.6, 23.5) <sup>c</sup> | 5.7 (4.7, 6.6)    | 19.6 (17.8, 21.4) <sup>c</sup> |

<sup>a</sup>All values are expressed as % (95% confidence interval).

<sup>b</sup>Age and sex adjusted using the world standard population by the age groups.

<sup>c</sup>Chi-square test between two surveys, P<0.05.

doi:10.1371/journal.pone.0116019.t002

**Table 3.** The age-specific and sex-specific odds ratios of overweight and obesity between 1991 and 2011<sup>a</sup>.

| Age group   | Men             |                    | Women           |                    | Total           |                    |
|-------------|-----------------|--------------------|-----------------|--------------------|-----------------|--------------------|
|             | OR <sup>b</sup> | 95%CI <sup>c</sup> | OR <sup>b</sup> | 95%CI <sup>c</sup> | OR <sup>b</sup> | 95%CI <sup>c</sup> |
| Overweight  |                 |                    |                 |                    |                 |                    |
| 35–44 years | 3.04            | 2.10–4.39          | 1.20            | 0.83–1.73          | 1.81            | 1.40–2.33          |
| 45–54 years | 3.34            | 2.14–5.21          | 2.06            | 1.44–2.96          | 2.61            | 1.97–3.45          |
| 55–64 years | 1.90            | 1.29–2.80          | 2.42            | 1.72–3.42          | 2.20            | 1.70–2.84          |
| 65–74 years | 2.58            | 1.61–4.15          | 1.80            | 1.16–2.81          | 2.63            | 1.88–3.68          |
| Total       | 2.72            | 2.22–3.33          | 1.82            | 1.53–8.17          | 2.23            | 1.95–2.55          |
| Obesity     |                 |                    |                 |                    |                 |                    |
| 35–44 years | 11.25           | 4.90–25.82         | 2.98            | 1.78–5.01          | 4.23            | 2.82–6.33          |
| 45–54 years | 6.97            | 3.14–15.49         | 3.07            | 1.81–5.19          | 4.25            | 2.75–6.57          |
| 55–64 years | 7.27            | 3.04–17.36         | 2.16            | 1.47–3.17          | 4.98            | 3.33–7.43          |
| 65–74 years | 7.46            | 2.87–19.43         | 4.08            | 1.99–8.39          | 5.23            | 2.95–9.26          |
| Total       | 8.06            | 5.30–12.27         | 2.93            | 2.27–3.78          | 4.04            | 3.27–5.00          |

<sup>a</sup>To reference as 1991.

<sup>b</sup>indicated age-adjusted Odds Ratio.

<sup>c</sup>indicated 95% confidence intervals of OR.

doi:10.1371/journal.pone.0116019.t003

## Discussion

Recent studies have documented that obesity is an independent risk factor for many chronic conditions, resulting in not only hypertension, diabetes mellitus, hyperlipidemia, and metabolic syndrome, but also in an increased incidence of certain cancers [19–23].

Since the 1980s, the prevalence of obesity and overweight continues to increase worldwide [1, 24–27]. It is predicted that if recent secular trends continue unabated, absolute numbers are projected to reach a total of 2.16 billion overweight and 1.12 billion obese individuals by the year 2030 [28].

The result from the Diogenes cohort showed that the obesity prevalence increased from 13% to 17% since the 1990s [29]. In the United States, the prevalence of obesity increased significantly between 1999 and 2000 (27.5%) and between 2003 and 2004 (31.1%) among men, but not among women (33.4% in 1999–2000 vs. 33.2% in 2003–2004) [30]; however, the increases in the prevalence of obesity do not appear to be continuing at the same rate as that observed between 1999–2000 and between 2007–2008, particularly for women and possibly for men [31].

The data from China indicated that the prevalence of overweight and obesity in men was 9.9% and 0.8% in 1991 and 24.1% and 2.8% in 2002, respectively; corresponding rates in women were 12.9% and 1.9% in 1991 and 26.1% and 5.0% in 2002, respectively [32, 33]. A cross-sectional study conducted in 2004–2006 suggested that the prevalence rates of overweight and obesity in rural China were 20.4% and 2.0%, respectively [34]. In the present study, the prevalence rates of overweight and obesity were 42.0% and 19.6% in 2011, respectively, with

**Table 4.** The age- and sex-adjusted prevalence of obesity by cardiovascular risk factors subgroup between 1991 and 2011<sup>a</sup>.

|                            | Men             |                                | Women             |                                | Total             |                                |
|----------------------------|-----------------|--------------------------------|-------------------|--------------------------------|-------------------|--------------------------------|
|                            | 1991            | 2011                           | 1991              | 2011                           | 1991              | 2011                           |
| Education level:           |                 |                                |                   |                                |                   |                                |
| None                       | 2.6 (0.9, 4.3)  | 3.0 (0, 7.4)                   | 5.9 (3.8, 8.0)    | 34.2 (27.9, 40.5) <sup>b</sup> | 4.6 (3.1, 6.0)    | 28.8 (23.4, 34.1) <sup>b</sup> |
| 1–6 years                  | 1.4 (0.3, 2.5)  | 20.0 (15.5, 24.6) <sup>b</sup> | 10.0 (7.4, 12.5)  | 21.8 (17.7, 25.8) <sup>b</sup> | 4.7 (3.4, 6.1)    | 20.5 (17.5, 23.5) <sup>b</sup> |
| 7–9 years                  | 3.8 (1.5, 6.2)  | 20.3 (16.5, 24.0) <sup>b</sup> | 4.0 (0.9, 7.2)    | 19.2 (15.4, 23.1) <sup>b</sup> | 4.2 (2.2, 6.1)    | 20.8 (18.0, 23.5) <sup>b</sup> |
| >9 years                   | 4.8 (0, 13.5)   | 18.2 (9.5, 26.8)               | 3.4 (0, 14.1)     | 9.1 (1.0, 17.1)                | 4.1 (0, 10.8)     | 17.0 (10.4, 23.6)              |
| Hypertension               |                 |                                |                   |                                |                   |                                |
| No                         | 0               | 5.8 (1.0, 10.5)                | 4.0 (1.5, 6.5)    | 6.8 (1.2, 12.3) <sup>b</sup>   | 2.4 (0.8, 4.0)    | 47 (1.5, 7.9) <sup>b</sup>     |
| Yes                        | 4.3 (2.3, 6.3)  | 24.1 (20.2, 27.9) <sup>b</sup> | 13.1 (10.0, 16.2) | 25.9 (22.5, 29.4) <sup>b</sup> | 9.3 (7.3, 11.2)   | 25.8 (23.2, 28.4) <sup>b</sup> |
| Blood pressure Categories: |                 |                                |                   |                                |                   |                                |
| Prehypertension            | 1.5 (0.4, 2.5)  | 13.5 (9.6, 17.4) <sup>b</sup>  | 7.2 (4.9, 9.5)    | 16.2 (12.5, 20.0) <sup>b</sup> | 4.1 (2.8, 5.4)    | 15.2 (12.5, 17.9) <sup>b</sup> |
| Stage I Hypertension       | 3.6 (1.4, 5.8)  | 17.4 (12.5, 22.3) <sup>b</sup> | 10.7 (7.0, 14.5)  | 23.0 (18.6, 27.4) <sup>b</sup> | 7.2 (5.0, 9.4)    | 20.8 (17.5, 24.2) <sup>b</sup> |
| Stage II Hypertension      | 6.2 (1.9, 10.5) | 32.3 (26.5, 38.1) <sup>b</sup> | 18.3 (12.8, 23.8) | 29.6 (24.3, 34.4) <sup>b</sup> | 14.4 (10.5, 18.3) | 30.9 (27.0, 34.9) <sup>b</sup> |
| Diabetes                   |                 |                                |                   |                                |                   |                                |
| No                         | 2.5 (1.6, 3.5)  | 17.8 (15.2, 20.4) <sup>b</sup> | 7.7 (6.1, 9.2)    | 20.4 (17.9, 22.9) <sup>b</sup> | 5.2 (4.3, 6.2)    | 19.2 (17.4, 21.0) <sup>b</sup> |
| Yes                        | 5.8 (0, 18.0)   | 27.1 (11.9, 42.3) <sup>b</sup> | 23.2 (10.0, 34.5) | 55.4 (42.7, 68.1) <sup>b</sup> | 19.4 (8.8, 30.0)  | 39.4 (29.4, 49.4) <sup>b</sup> |
| Current smoking            |                 |                                |                   |                                |                   |                                |
| No                         | 2.8 (1.4, 4.2)  | 21.8 (18.3, 25.2) <sup>b</sup> | 8.3 (6.7, 9.9)    | 20.7 (18.3, 23.2) <sup>b</sup> | 6.5 (5.3, 7.6)    | 20.9 (18.3, 22.9) <sup>b</sup> |
| Yes                        | 2.4 (1.0, 3.7)  | 13.1 (9.4, 16.8) <sup>b</sup>  | 8.5 (0.1, 16.8)   | 55.3 (41.7, 69.0) <sup>b</sup> | 3.0 (1.6, 4.5)    | 15.6 (11.9, 19.3) <sup>b</sup> |
| Alcohol Drinking           |                 |                                |                   |                                |                   |                                |
| No                         | 2.6 (1.6, 3.7)  | 19.0 (15.9, 22.2) <sup>b</sup> | 8.4 (7.8, 11.0)   | 20.9 (18.4, 23.3) <sup>b</sup> | 6.0 (5.0, 7.0)    | 20.2 (18.3, 22.2) <sup>b</sup> |
| Yes                        | 2.3 (0.2, 4.4)  | 17.8 (13.3, 22.3) <sup>b</sup> | 0                 | 23.1 (11.2, 35.0)              | 2.1 (0.1, 4.2)    | 18.8 (14.5, 23.1) <sup>b</sup> |

<sup>a</sup>All values are expressed as % (95% confidence interval).

<sup>b</sup>Chi-square test was used to compare the difference between two surveys,  $P < 0.05$ .

doi:10.1371/journal.pone.0116019.t004

respective increases of 1.2-fold and 3.0-fold from 1991. The increase in prevalence of overweight and obesity was greater among men than among women, increasing by 1.7-fold and 82% for overweight and 7.1-fold and 1.9-fold for obesity, respectively. The largest increase was observed in men aged 35–44 years, increasing by 2-fold for overweight and 10.3-fold for obesity.

The previous studies have indicated that obesity is an important risk factor for hypertension and diabetes [35–38]; low education level, alcohol consumption, and lack of physical activity are all associated with obesity [9, 39]. Consistent with these studies, in the present study, the prevalence of obesity increased significantly from 1991 to 2011 in individuals, both men and women, who smoked or consumed alcohol, and in those with a lower educational level, hypertension, or type 2 diabetes. The prevalence of obesity among those who consumed alcohol had the greatest increase (increased by 8.0-fold). Moreover, there was a 5.3-fold increase in the prevalence of obesity in illiterate residents overall.

Rapid economic development in China may be a potential explanation for the upward trend in prevalence rates of overweight and obesity observed in our study.



The marked increase in obesity prevalence may result in a greater burden on cardiovascular health. Thus, the relationship between obesity and cardiovascular health can never be overestimated.

Over the past 21 years, there has been an extensive shift in the level of agricultural mechanization, resulting in a significant decrease in the need for rural laborers. Furthermore, changes in lifestyle and diet have significantly altered traditional diet and structure among rural residents. Documents from the Ministry of Health of the People's Republic of China showed that the energy ratio obtained from cereal decreased 15.3%, but the energy ratio obtained from animals and fat increased by 87.1% and 48.9%, respectively, among rural residents from 1992 to 2002 [5]. Moreover, the prevalence of obesity among children and adolescents has risen significantly in China during 1985–2010; in particular, the prevalence rate of obese or overweight increase annually by 9% in boys from rural areas [40, 41]. If this trend continues, this in turn will result in a higher prevalence of hypertension and an increased incidence of cardiovascular disease and stroke.

Our study has several limitations. First, there were certain differences between the 1991 and 2011 surveys with regard to the distribution of subjects' age and sex (i.e., the number of subjects in the 35–44-year age group was lower in 2011 than in 1991). However, to compare differences in the prevalence of overweight and obesity by education level, hypertension, diabetes, current smoking, alcohol drinking between 1991 and 2011, we adjusted for both age and sex using the world standard population in 2000 as the reference population. In addition, the impact of aging may be more severe in rural areas than in urban areas, as young people migrate from rural areas to cities for economic opportunities or education. Over the past 20 years, the proportion of the Chinese population living in rural areas has decreased from 73% in 1990 to 50% in 2010, whereas only 22% of the population resided in Tianjin, China in 2010. Moreover, the percentage of residents in Ji County aged 35–44 years decreased from 40% in 1991 to 22% in 2011. Therefore, we conducted subgroup analyses stratified by age and sex in the statistical analyses. Second, our data were derived from two cross-sectional surveys conducted in 1991 and 2011 that were used to analyze 20-year trends in the prevalence of overweight and obesity. However, this time interval was relatively long; thus, our study lacks data on 5-year, 10-year, and 15-year trends. Finally, with the exception of smoking and alcohol consumption, we did not have detailed information regarding lifestyle and dietary habits; therefore, other possible determinants of overweight and obesity were not included in this study.

## Conclusions

We assessed the prevalence of overweight and obesity among rural residents of Tianjin, China, and revealed a sharp upward trend following 20 years of rapid economic development. The increase in the prevalence of overweight and obesity was especially significant among both young men and women. The prevalence of obesity increased dramatically among individuals with a low education level and

among those who consume alcohol. Our study provides evidence of the severity of the obesity epidemic in adults of rural northern China and the emerging need to control this epidemic. The findings of this study also suggested that obesity is the crucial public health issue in both urban and rural populations in China. In addition, our findings forecast the persistent increase in the incidence of stroke and cardiovascular disease unless these risk factors are efficiently controlled in young adults.

## Acknowledgments

We thank the residents of Ji County who participated in this study and local medical care professionals for their enthusiasm, tireless work, and sustained support.

## Author Contributions

Conceived and designed the experiments: JW XN TCS. Performed the experiments: CZ LY JT HG. Analyzed the data: YY JW. Contributed reagents/materials/analysis tools: JT CZ HG. Contributed to the writing of the manuscript: JW XN.

## References

1. **Finucane MM, Stevens GA, Cowan MJ, Danaei G, Lin JK, et al.** (2011) National, regional, and global trends in body-mass index since 1980: systematic analysis of health examination surveys and epidemiological studies with 960 country-years and 9.1 million participants. *Lancet* 377(9765): 557–567.
2. **Ministries of Health and Science and Technology and the National Bureau of Statistics of the Peoples Republic of China** (2005) *The nutrition and health status of the Chinese people*, People's Medical Publishing House.
3. **James PT, Rigby N, Leach R** (2004) The obesity epidemic, metabolic syndrome and future prevention strategies. *Eur J Cardiovasc Prev Rehabil* 11(1): 3–8.
4. **Kelly T, Yang W, Chen CS, Reynolds K, He J** (2008) Global burden of obesity in 2005 and projections to 2030. *Int J Obes (Lond)* 32(9): 1431–1437.
5. **James PT** (2004) Obesity: the worldwide epidemic. *Clin Dermatol* 22(4): 276–280.
6. **Obesity: preventing and managing the global epidemic.** Report of a WHO consultation (2000) *World Health Organ Tech Rep Ser* 894(i–xii): 1–253.
7. **WHO Expert Consultation** (2004) Appropriate body-mass index for Asian populations and its implications for policy and intervention strategies. *Lancet* 363(9403): 157–163.
8. **Arnett DK, McGovern PG, Jacobs DR Jr, Shahar E, Duval S, et al.** (2002) Fifteen-year trends in cardiovascular risk factors (1980–1982 through 1995–1997): the Minnesota Heart Survey. *Am J Epidemiol* 156(10): 929–935.
9. **Flegal KM, Carroll MD, Ogden CL, Johnson CL** (2002) Prevalence and trends in obesity among US adults, 1999–2000. *JAMA* 288(14): 1723–1727.
10. **Ng M, Fleming T, Robinson M, Thomson B, Graetz N, et al.** (2014) Global, regional, and national prevalence of overweight and obesity in children and adults during 1980–2013: a systematic analysis for the Global Burden of Disease Study 2013. *Lancet* 6736(14): 604–608.

11. **Ministries of Health and Science and Technology and the National Bureau of Statistics of the Peoples Republic of China** (2004) The nutrition and health status of the Chinese people. Beijing: State Information Office.
12. **Wang J, Ning X, Yang L, Lu H, Tu J, et al.** (2014) Trends of hypertension prevalence, awareness, treatment and control in rural areas of northern China during 1991–2011. *J Hum Hypertens* 28: 25–31.
13. **Jinghua Wang, Xianjia Ning, Li Yang, Jun Tu, Hongfei Gu, et al.** (2014) Sex differences in trends of incidence and mortality of first-ever stroke in rural Tianjin, China, from 1992 to 2012. *Stroke* 45: 1626–1631.
14. **Jinghua Wang, Zhongping An, Bin Li, Li Yang, Jun Tu, et al.** (2014) Increasing Stroke Incidence and Prevalence of Risk Factors in a Low-Income Chinese Population. *Neurology*: In press.
15. **Wang L, Kong L, Wu F, Bai Y, Burton R** (2005) Preventing chronic diseases in China. *Lancet* 366: 1821–1824.
16. **Zhou BF** (2002) Effect of body mass index on all-cause mortality and incidence of cardiovascular diseases—report for meta-analysis of prospective studies on optimal cut-off points of body mass index in Chinese adults. *Biomed Environ Sci* 15(3): 245–252.
17. **Chobanian AV, Bakris GL, Black HR, Cushman WC, Green LA, et al.** (2003) The seventh report of the Joint National Committee on Prevention, Detection, Evaluation, and Treatment of high blood pressure: The JNC 7 report. *JAMA* 289: 2560–2572.
18. **Ahmad OB B-PC, Lopez AD, Murray CJL, Lozano R, Inoue M** (2001) Age standardization of rates: A new WHO world standard. *GPE Discussion Paper Series*, No 31. Geneva, EIP/GPE/EBD, WHO.
19. **Hu G, Barengo NC, Tuomilehto J, Lakka TA, Nissinen A, et al.** (2004) Relationship of physical activity and body mass index to the risk of hypertension: a prospective study in inland. *Hypertension* 43(1): 25–30.
20. **Hu G, Lindstrom J, Valle TT, Eriksson JG, Jousilahti P, et al.** (2004) Physical activity, body mass index, and risk of type 2 diabetes in patients with normal or impaired glucose regulation. *Arch Intern Med* 164(8): 892–896.
21. **Grundey SM, Cleeman JI, Daniels SR, Donato KA, Eckel RH, et al.** (2005) American Heart Association; National Heart, Lung, and Blood Institute. Diagnosis and management of the metabolic syndrome: an American Heart Association/National Heart, Lung, and Blood Institute Scientific Statement. *Circulation* 112(17): 2735–2752.
22. **Hu G, Tuomilehto J, Silventoinen K, Barengo N, Jousilahti P** (2004) Joint effects of physical activity, body mass index, waist circumference and waist-to-hip ratio with the risk of cardiovascular disease among middle-aged Finnish men and women. *Eur Heart J* 25(24): 2212–2219.
23. **Hu G, Tuomilehto J, Silventoinen K, Barengo NC, Peltonen M, et al.** (2005) The effects of physical activity and body mass index on cardiovascular, cancer and all-cause mortality among 47 212 middle-aged Finnish men and women. *Int J Obes (Lond)* 29(8): 894–902.
24. **Zaninotto P, Head J, Stamatakis E, Wardle H, Mindell J** (2009) Trends in obesity among adults in England from 1993 to 2004 by age and social class and projections of prevalence to 2012. *J Epidemiol Community Health* 63(2): 140–146.
25. **Wang Y, Beydoun MA, Liang L, Caballero B, Kumanyika SK** (2008) Will all Americans become overweight or obese? estimating the progression and cost of the US obesity epidemic. *Obesity (Silver Spring)* 16(10): 2323–2330.
26. **Wang YC, Colditz GA, Kuntz KM** (2007) Forecasting the obesity epidemic in the aging U.S. population. *Obesity (Silver Spring)* 15(11): 2855–2865.
27. **Malta DC, Andrade SC, Claro RM, Bernal RT, Monteiro CA** (2014) Trends in prevalence of overweight and obesity in adults in 26 Brazilian state capitals and the Federal District from 2006 to 2012. *Rev Bras Epidemiol* 17 Suppl 1: 267–276.
28. **Kelly T, Yang W, Chen CS, Reynolds K, He J** (2008) Global burden of obesity in 2005 and projections to 2030. *Int J Obes (Lond)* 32: 1431–1437.
29. **von Ruesten A, Steffen A, Floegel A, van der A DL, Masala G, et al.** (2011) Trend in obesity prevalence in European adult cohort populations during follow-up since 1996 and their predictions to 2015. *PLoS One* 6(11): e27455.

30. **Ogden CL, Carroll MD, Curtin LR, McDowell MA, Tabak CJ, et al.** (2006) Prevalence of overweight and obesity in the United States, 1999–2004. *JAMA* 295(13): 1549–1555.
31. **Flegal KM, Carroll MD, Ogden CL, Curtin LR** (2010) Prevalence and trends in obesity among US adults, 1999–2008. *JAMA* 303(3): 235–241.
32. **Reynolds K, Gu D, Whelton PK, Wu X, Duan X, et al.** (2007) InterASIA Collaborative Group. Prevalence and risk factors of overweight and obesity in China. *Obesity (Silver Spring)* 15(1): 10–18.
33. **Gu D, Huang G, Wu X, Duan X** (2002) Relationship between body mass index and major cardiovascular diseases in Chinese population. *Zhonghua Yi Xue Za Zhi* 82(15): 1018–21.
34. **Zhang X, Sun Z, Zhang X, Zheng L, Liu S, et al.** (2008) Prevalence and associated factors of overweight and obesity in a Chinese rural population. *Obesity (Silver Spring)* 16(1): 168–171.
35. **Whitlock G, Lewington S, Sherliker P, the Prospective Studies Collaboration** (2009) Body-mass index and cause-specific mortality in 900 000 adults: collaborative analyses of 57 prospective studies. *Lancet* 373: 1083–1096.
36. **Wormser D, Kaptoge S, Di Angelantonio E, the Emerging Risk Factors Collaboration** (2011) Separate and combined associations of body-mass index and abdominal adiposity with cardiovascular disease: collaborative analysis of 58 prospective studies. *Lancet* 377: 1085–1095.
37. **Singh GM, Danaei G, Farzadfar F, the Global Burden of Metabolic Risk Factors of Chronic Diseases Collaborating Group, Asia-Pacific Cohort Studies Collaboration (APCSC), et al.** (2013) The age-specific quantitative effects of metabolic risk factors on cardiovascular diseases and diabetes: a pooled analysis. *PLoS One* 8: e65174.
38. **The Global Burden of Metabolic Risk Factors for Chronic Diseases Collaboration** (2013) Metabolic mediators of the effects of body-mass index, overweight, and obesity on coronary heart disease and stroke: a pooled analysis of 97 prospective cohorts with 1.8 million participants. *Lancet* 383: 970–983.
39. **Panagiotakos DB, Pitsavos C, Chrysohoou C, Rivas G, Kontogianni MD, et al.** (2004) Epidemiology of overweight and obesity in a Greek adult population: the ATTICA Study. *Obes Res* 12(12): 1914–1920.
40. **Song Y, Wang HJ, Ma J, Wang Z** (2013) Secular trends of obesity prevalence in urban Chinese children from 1985 to 2010: gender disparity. *PLoS One* 8(1): e53069.
41. **Hongpeng Sun, Yana Ma, Di Han, Chen-Wei Pan, Yong Xu** (2014) Prevalence and Trends in Obesity among China's Children and Adolescents, 1985–2010. *PLoS One* 9(8): e105469.
